# Supplementary material
Source: Springer Nature journal article supplement (https://www.springermedizin.de/resource/supplementary/12986_2010_271_MOESM7_ESM.pdf/25655726)

**A Adipose**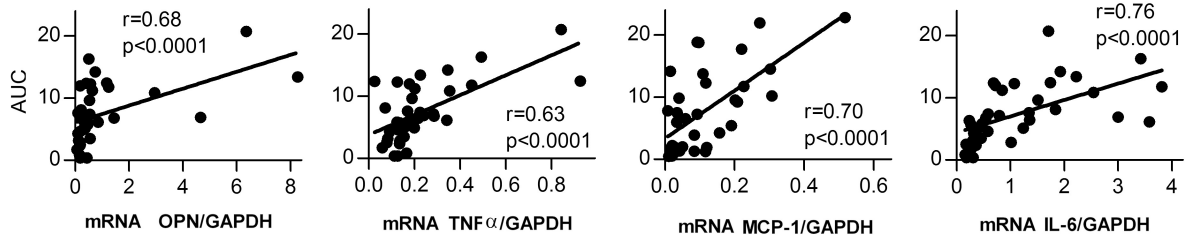**B Liver**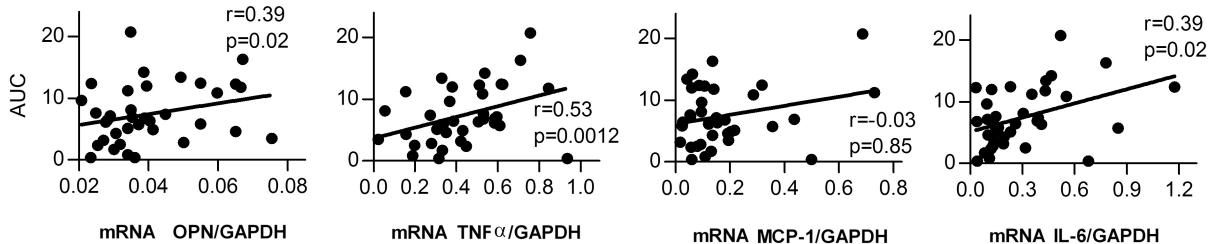

Supplement: MOESM7 [file 25655726]
